# Supplementary material for: Electrochemical deposition of dopamine–hyaluronic acid conjugates for anti-biofouling bioelectrodes
Source: Royal Society of Chemistry journal article supplement (doi:10.1039/c7tb00028f), 2017-01-01
Supplement: c7tb00028f1.pdf [file c7tb00028f1.pdf]

## Supporting Information

# Electrochemical surface coating of dopamine-hyaluronic acid conjugates for the production of anti-biofouling electrodes

**Semin Kim<sup>a</sup>, Yohan Jang<sup>a</sup>, Lindy K. Jang<sup>a</sup>, Sung Hyuk Sunwoo<sup>c</sup>, Tae-il Kim<sup>c</sup>,  
Seung-Woo Cho<sup>d</sup>, and Jae Young Lee<sup>a, b\*</sup>**

<sup>a</sup> School of Materials Science and Engineering, Gwangju Institute of Science and Engineering (GIST), Gwangju 500-712, Republic of Korea Address here.

<sup>b</sup> Gwangju Institute of Science and Technology, Department of Biomedical Science and Engineering, Gwangju, Gwangju 500-712, Republic of Korea

<sup>c</sup> School of Chemical Engineering, Sungkyunkwan University (SKKU), Suwon 440-746, Republic of Korea

<sup>d</sup> Department of Biotechnology, Yonsei University, Seoul 120-749, Republic of Korea

\* jaeyounglee@gist.ac.kr, Fax: +82-62-715-2324, Tel: +82-62-715-2358

### **Contents:**

**Figure S1.** <sup>1</sup>H NMR spectrum of dopamine-hyaluronic acid conjugates (in D<sub>2</sub>O).

**Figure S2.** Standard curve of dopamine and absorbance at 280 nm.

**Figure S3.** UV-vis spectra of DA-HA solution with a peak appearing at 280 nm.

**Figure S4.** A florescence image of the electrode selectively coated with DA-HA.

**Figure S5.** Toluidine Blue O (TBO) staining of the DA-HA coated electrode.

**Figure S6.** AFM images of a bare ITO and DA-HA coated ITO. AFM image at the border of bare and the DA-HA-coated area.

**Figure S7.** Optical images of the DA-HA coated ITO and the PY-HA coated ITO after scratching with different pencils (from 4B to H).

**Figure S8.** Live/dead staining of NIH-3T3 cells after direct contact with electrodes (ITO and DA-HA-coated ITO) for 48 h.

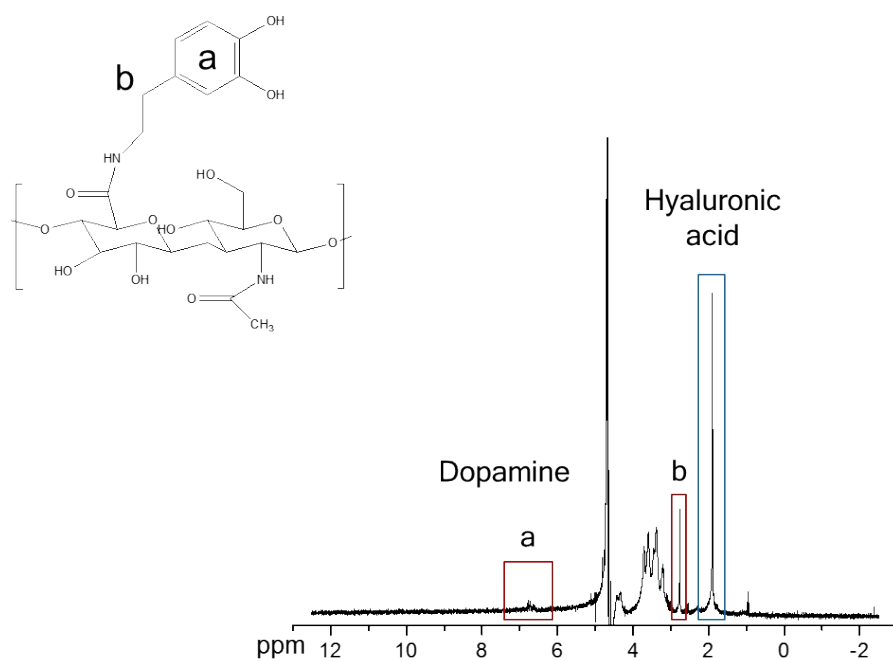

**Figure S1.**  $^1\text{H}$  NMR spectrum of dopamine-hyaluronic acid conjugates (in  $\text{D}_2\text{O}$ ).

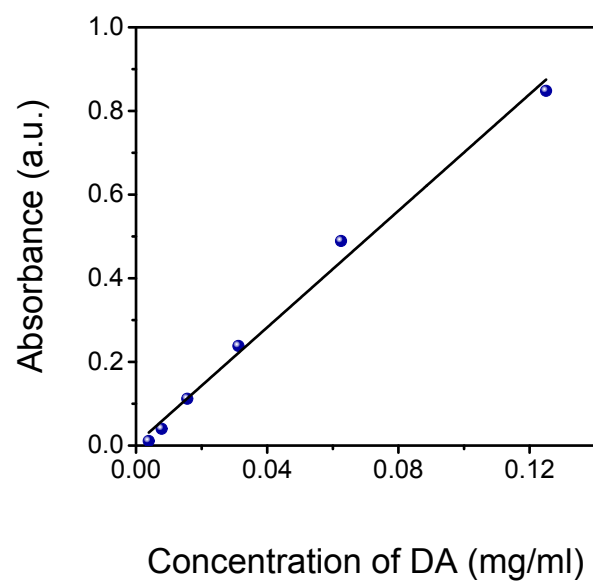

**Figure S2.** Standard curve of dopamine and absorbance at 280 nm.

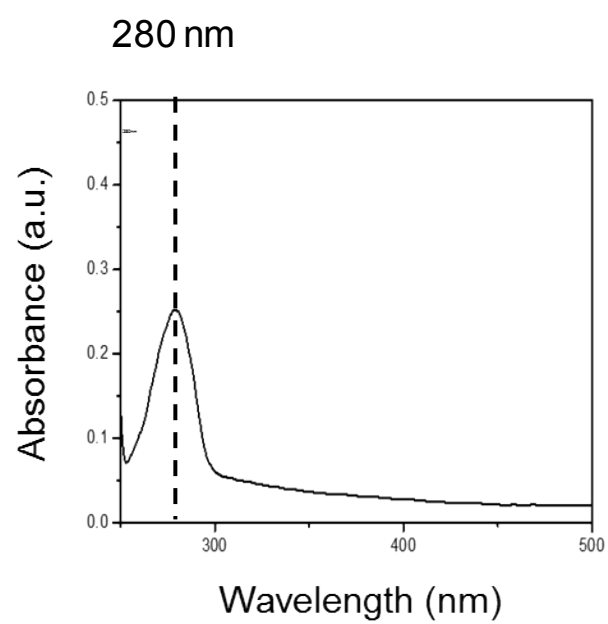

**Figure S3.** UV-vis spectra of DA-HA solution with a peak appearing at 280 nm.

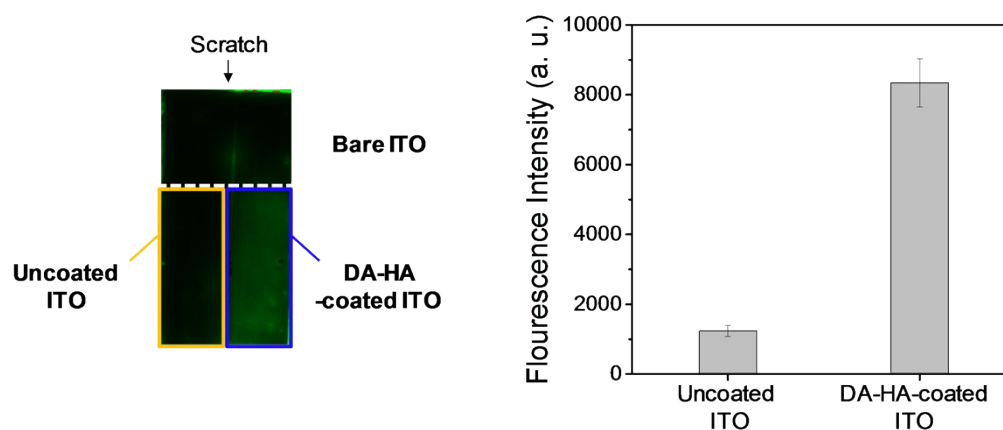

**Figure S4.** A florescence image of the electrode selectively coated with DA-HA. Immunostaining was performed using HABP-F and substantial florescence was observed on the HA-coated electrodes of ITO, whereas no detectable florescence was observed for the bare and uncoated electrodes.

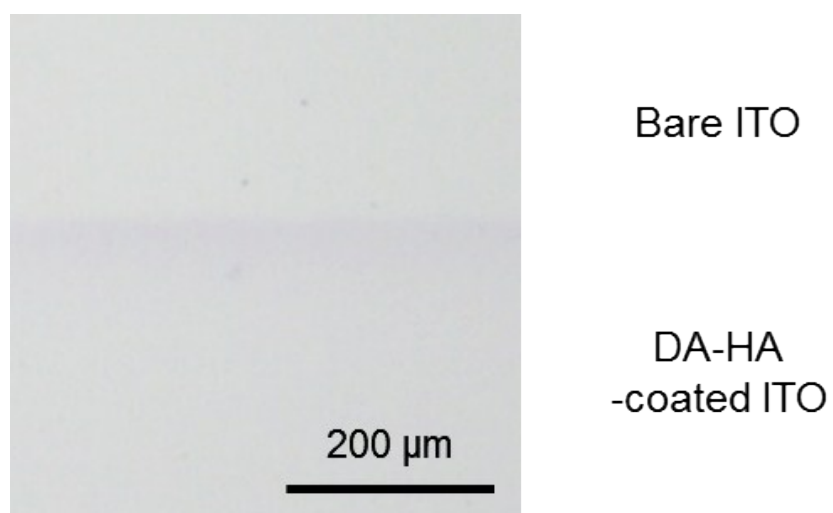

**Figure S5.** Toluidine Blue O (TBO) staining of the DA-HA coated electrode.

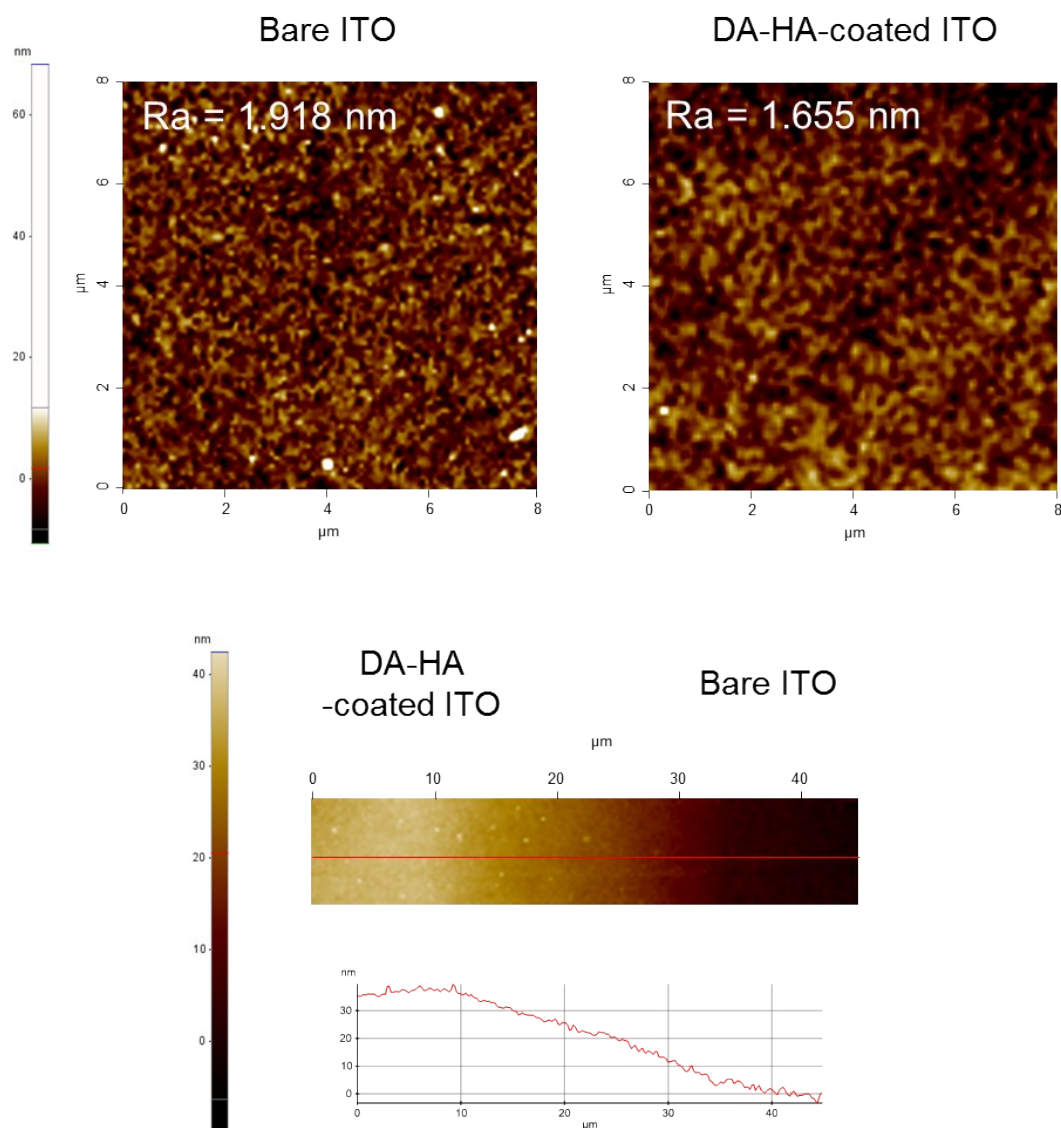

**Figure S6.** AFM images of a bare ITO and DA-HA coated ITO (top). AFM image at the border of bare and the DA-HA-coated area (bottom).

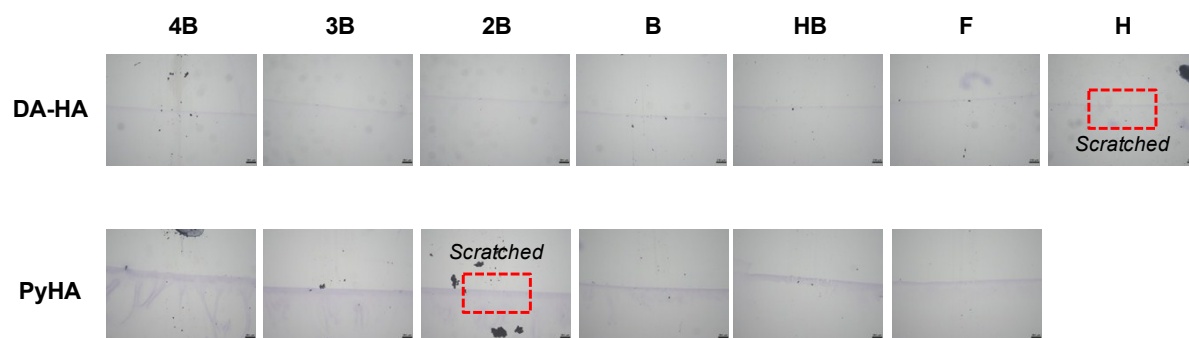

**Figure S7.** Optical images of the DA-HA coated ITO and the PY-HA coated ITO after scratching with different pencils (from 4B to H).



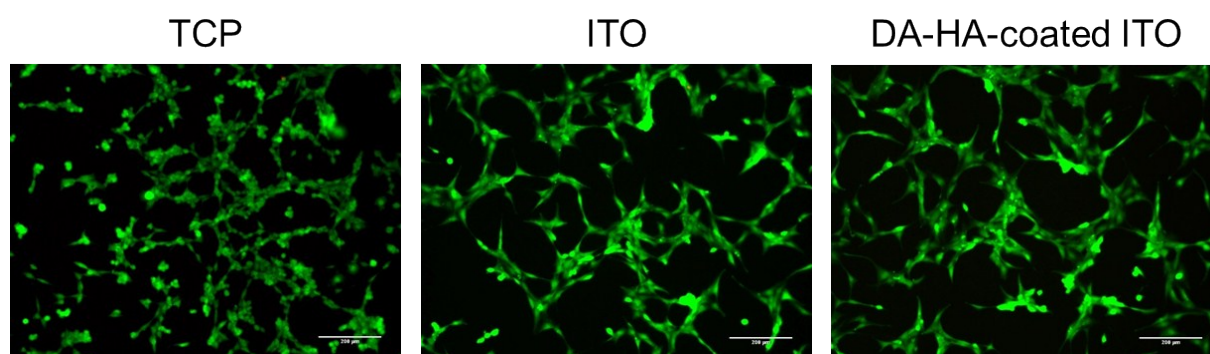

**Figure S8.** Live/dead staining of NIH-3T3 cells after direct contact with electrodes (ITO and DA-HA-coated ITO) for 48 h. Live and dead cells stained green and red, respectively. For the cytocompatibility studies, NIH-3T3 fibroblasts were first seeded on tissue culture plate ( $10^4$  cells per well) in 12 well culture plates and incubated for 24 h in DMEM supplemented with 10% FBS, and penicillin/streptomycin at 37°C in a humidified incubator with 5% CO<sub>2</sub>. After 24 h pre-incubation, the sterile electrodes (UV exposed for 3 h) were then carefully placed on the cells growing 12 well culture plates to make the DA-HA-coated surface and unmodified ITO surface have direct contact with cells. After additional 48 h of incubation with direct contact, cells were stained by a Live/dead staining for cytotoxicity assessment. For a control, cells were incubated without any introduction of substrates during incubation and stained, which was marked as 'TCP'. The stained cell images were obtained by a fluorescence microscope.
